# Supplementary material for: First Phylogeny of Pseudolychnuris Reveals Its Polyphyly and a Staggering Case of Convergence at the Andean Paramos (Lampyridae: Lampyrini)
Source: MDPI journal article supplement (doi:10.3390/insects13080697), 2022-08-03
Supplement: s1 [file s1]

**Table S1.** Index values obtained with different K values (according to Mirande, 2009)  
Trees= number of equally most parsimonious trees obtained; L= number of steps of the most parsimonious tree(s); fit: total fit of the tree; RI= retention index; CI= Consistency index; SPR= average values of SPR comparisons to every other topology.

| <b>Interval</b> | <b>F</b>  | <b>K</b>     | <b>Trees</b> | <b>L</b>   | <b>fit</b>    | <b>RI</b>   | <b>CI</b>   | <b>SPR</b>     |
|-----------------|-----------|--------------|--------------|------------|---------------|-------------|-------------|----------------|
| 1               | 50        | 1.152        | 2            | 301        | 39.309        | 0,57        | 0,38        | 0,92808        |
| 2               | 54        | 1.353        | 2            | 301        | 37.251        | 0,57        | 0,38        | 0,92808        |
| 3               | 58        | 1.591        | 2            | 301        | 35.106        | 0,57        | 0,38        | 0,92808        |
| 4               | 62        | 1.880        | 2            | 301        | 32.843        | 0,57        | 0,38        | 0,92808        |
| 5               | 66        | 2.237        | 2            | 301        | 30.452        | 0,57        | 0,38        | 0,92808        |
| <b>6</b>        | <b>70</b> | <b>2.688</b> | <b>1</b>     | <b>301</b> | <b>27.912</b> | <b>0,57</b> | <b>0,38</b> | <b>0,92983</b> |
| 7               | 74        | 3.279        | 1            | 297        | 25.162        | 0,57        | 0,39        | 0,88421        |
| 8               | 78        | 4.085        | 1            | 297        | 22.203        | 0,57        | 0,39        | 0,88421        |
| 9               | 82        | 5.249        | 1            | 297        | 19.010        | 0,57        | 0,39        | 0,88421        |
| 10              | 86        | 7.078        | 1            | 297        | 15.534        | 0,57        | 0,39        | 0,88421        |
| 11              | 90        | 10.370       | 1            | 297        | 11.713        | 0,58        | 0,39        | 0,88421        |
